# Supplementary material for: Coupling liquid-phase microextraction with paper spray for rapid analysis of malachite green, crystal violet and their metabolites in complex samples using mass spectrometry
Source: Royal Society of Chemistry journal article supplement (doi:10.1039/c6ay01466f), 2016-01-01
Supplement: c6ay01466f1.pdf [file c6ay01466f1.pdf]

## Electronic supplementary information (ESI)

**Table S1** Methods for the determination of MG, CV, and their metabolites

| Analyte          | Matrix              | Pretreatment method | Detection system     | LOD                                            | Ref. |
|------------------|---------------------|---------------------|----------------------|------------------------------------------------|------|
| MG, CV           | Environmental water | TC-IL-DLLME         | HPLC-UV              | 0.086, 0.030 µg/L                              | 4    |
| MG               | Environmental water | IL-HF-LPME          | HPLC-UV              | 0.01 µg/L                                      | 5    |
| MG, CV, LMG, LCV | Fish                | IAC                 | HPLC-VIS             | 0.15, 0.1, 0.18 and 0.14 ng/g, respectively    | 6    |
| MG, LMG          | Fishpond water      | -                   | ELISA                | 0.05 µg/L                                      | 7    |
| MG, CV, LMG, LCV | Salmon              | SPE                 | LC-MS/MS             | 0.17, 0.35, 0.15 and 0.17 µg/kg, respectively  | 8    |
| MG, LMG          | Aquatic species     | SPE                 | LC-MS/MS             | 0.1 ng/g                                       | 9    |
| MG, LMG          | Fish                | SPE                 | LC-MS/MS             | 0.13, 0.16 µg/kg                               | 10   |
| MG, LMG          | Water               | SPE                 | LC-vis/FLD; LC-MS/MS | 0.05, 0.04 µg/L; 0.04, 0.03 µg/L, respectively | 11   |
| MG, CV           | Water               | MSPE                | VIS                  | -                                              | 12   |

-: no mention;

TC-IL-DLLME: temperature-controlled ionic liquid dispersive liquid-liquid microextraction;

IAC: immunoaffinity column.
